# Supplementary material for: Genetic polymorphisms of non-coding RNAs associated with increased head and neck cancer susceptibility: a systematic review and meta-analysis
Source: PubMed Central journal article supplement (PMC5617525; doi:10.18632/oncotarget.20096), 2017-08-09
Supplement: oncotarget-08-62508-s001.pdf [file oncotarget-08-62508-s001.pdf]

# Genetic polymorphisms of non-coding RNAs associated with increased head and neck cancer susceptibility: a systematic review and meta-analysis

## SUPPLEMENTARY MATERIALS

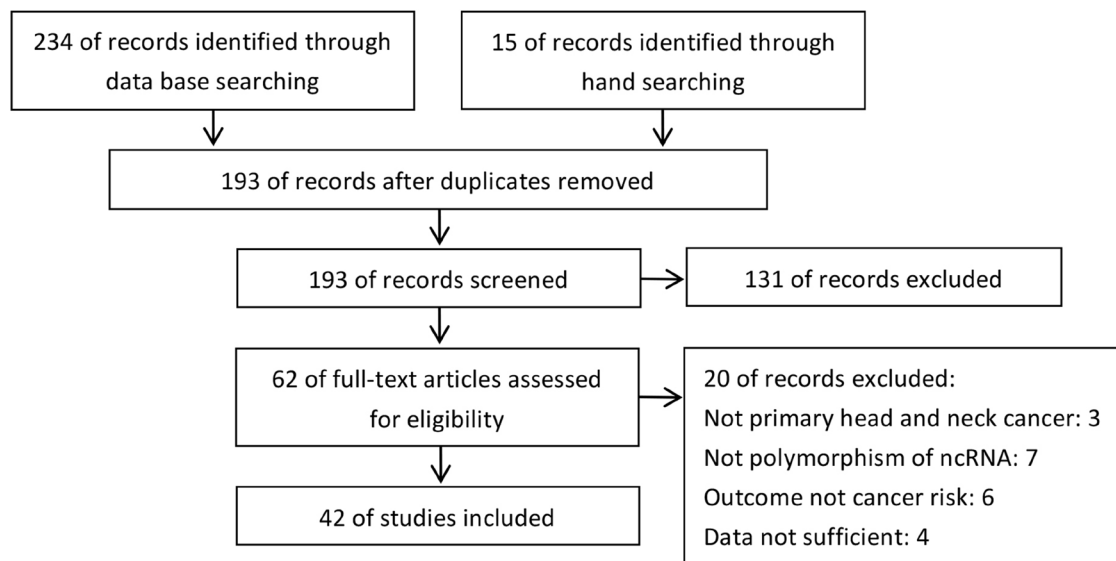

Supplementary Figure 1: Flow diagram of studies identification.

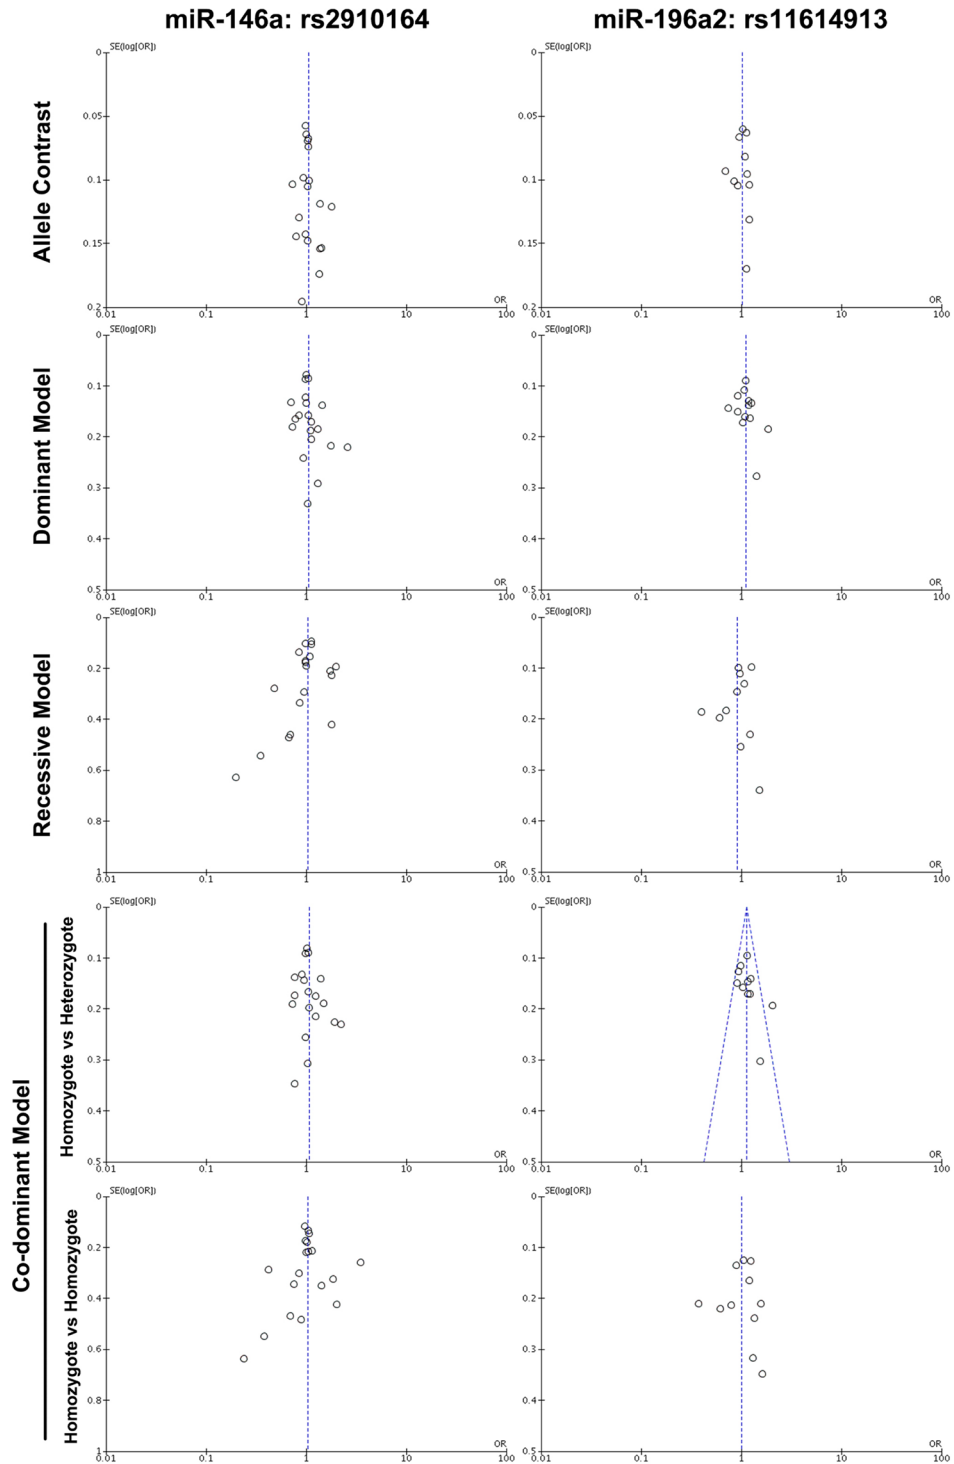

Supplementary Figure 2: Funnel plot of five genetic models of miR-146a rs2910164 and miR-196a2 rs11614913.

**Supplementary Table 1: Characteristics of included studies.** See Supplementary\_Table\_1

**Supplementary Table 2: Characteristics of SNPs that not eligible for meta-analysis.** See Supplementary\_Table\_2

**Supplementary Table 3: Publication bias tested by harbord test**

| SNPs                 | Allele Contrast | Dominant Model | Recessive Model | Co-dominant Model          |                          |
|----------------------|-----------------|----------------|-----------------|----------------------------|--------------------------|
|                      |                 |                |                 | Homozygote vs Heterozygote | Homozygote vs Homozygote |
| miR-146a rs2910164   | $P = 0.388$     | $P = 0.309$    | $P = 0.304$     | $P = 0.371$                | $P = 0.640$              |
| miR-196a2 rs11614913 | $P = 0.942$     | $P = 0.373$    | $P = 0.423$     | $P = 0.129$                | $P = 0.959$              |

SNP: single nucleotide polymorphisms.

**Supplementary Table 4: Overall result of meta-analysis of eligible SNPs.** See Supplementary\_Table\_4

**Supplementary Table 5: Subgroup analysis of eligible SNPs.** See Supplementary\_Table\_5
